# Supplementary material
Source: Springer Nature journal article supplement (https://www.springermedizin.de/resource/supplementary/13063_2013_1508_MOESM1_ESM.pdf/9620176)
Supplement: MOESM1 [file 9620176]

## Referents

Mobile outreach teams

Access to health care and public service teams (PASS)

Emergency departments and hospitals (somatic and psychiatric care)

## Assessment of homeless for eligibility by clinical research assistants and psychiatrists

Age > 18 years

Absolutely homeless or precarious housing

High level of need, including diagnosis of schizophrenia or bipolar disorder

## Randomisation of homeless individuals

**Housing First with  
assertive community  
treatment (N =300)**

**Treatment as usual\*  
(N=300)**

**Follow-up evaluation at baseline, 6, 12, 18 and 24 months  
by clinical research assistants**
